# Supplementary material for: Host-Derived Geranylgeraniol Shields Intraerythrocytic Stages of Malaria Parasites from Fosmidomycin
Source: Research Square preprint supplement (doi:10.21203/rs.3.rs-6574048/v1), 2025-06-05
Supplement: Supplementary file 1 [file c28e3456d09435ba39cf5bd9.docx]

**SUPPLEMENTARY INFORMATION**

**Figure S1. *In vivo* assays with Clone B.** Figure shows the parasitaemia progression of animals infected with either control parasites or Δ*Pb*PolK*P. berghei*parasites Clone B. Animals were untreated or treated with suboptimal dose of fosmidomycin, as indicated. The graphs represent one experiment, with each experimental group containing 3 animals (fosmidomycin-treated animals). To compare the parasitaemia progression between strains, the unpaired student's t-test was employed. *p<0.05, **p<0.01, ***p<0.001, ****p<0.0001. If not indicated, no significant differences were observed. The analyses were performed using the GraphPad PRISM® 5.3 program. Arrows indicate the days in which fosmidomycin was administered. This experiment concluded on the 10th day, when untreated animals reached a parasitaemia of >40%, and a significant difference between groups had already been demonstrated.

**
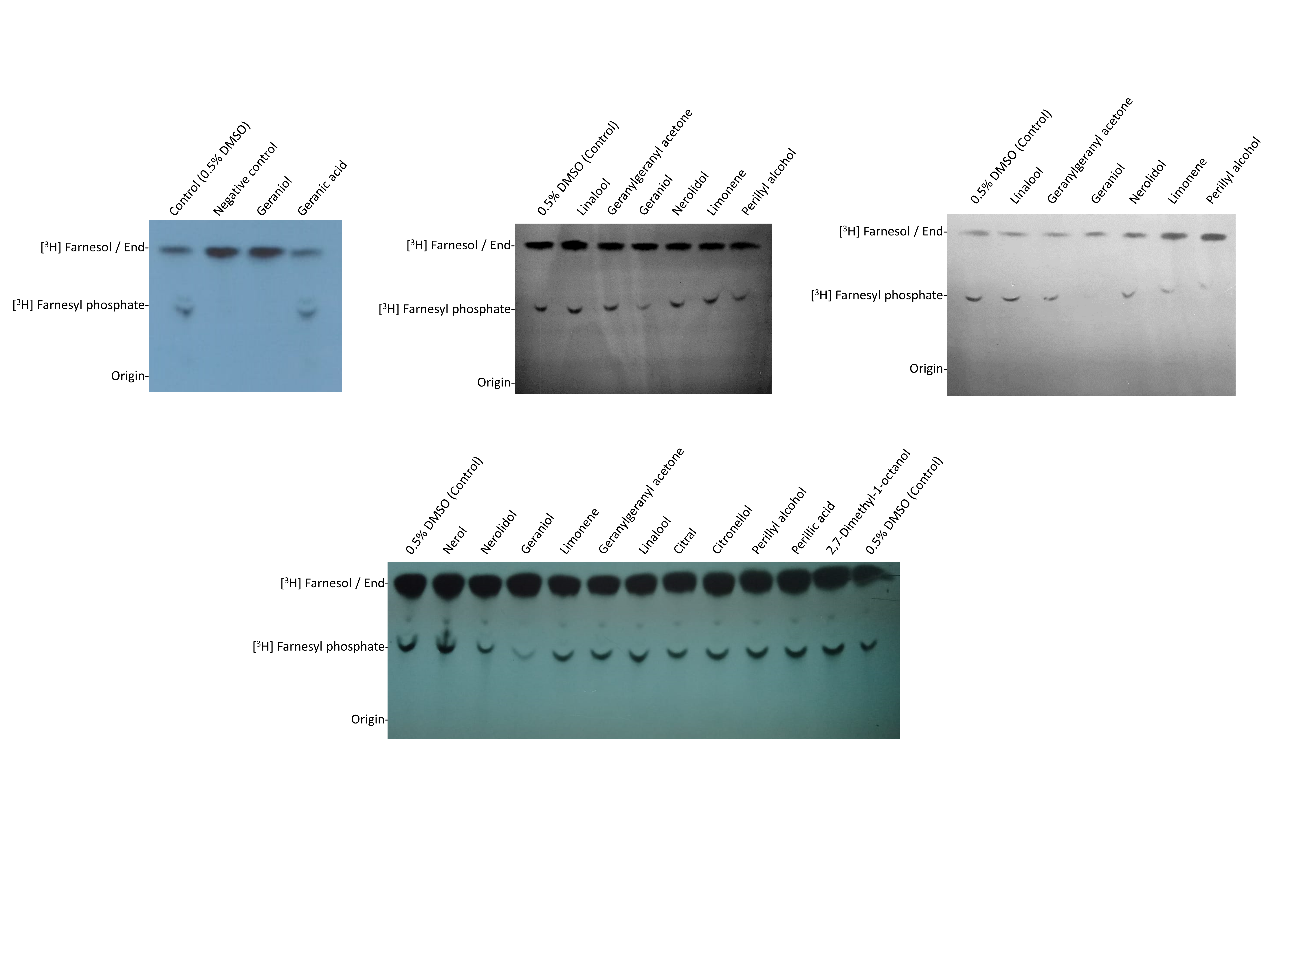
**

**Figure S2. *Pf*PolK activity assays.** Autoradiographs of the PolK enzymatic activity assays using [3H] FOH as substrate and chromatographed by TLC. The enzyme source of these assays came from whole extracts of yeast strains transformed with p416-*Pf*PolK. Compounds added to the enzymatic reaction are indicated under the TLC autoradiography image. The TLC retention of FOH and FP is also indicated.

**Figure S3. Geraniol dose-response effect.** Figure shows the geraniol dose-response curve 72h after treatment.

**
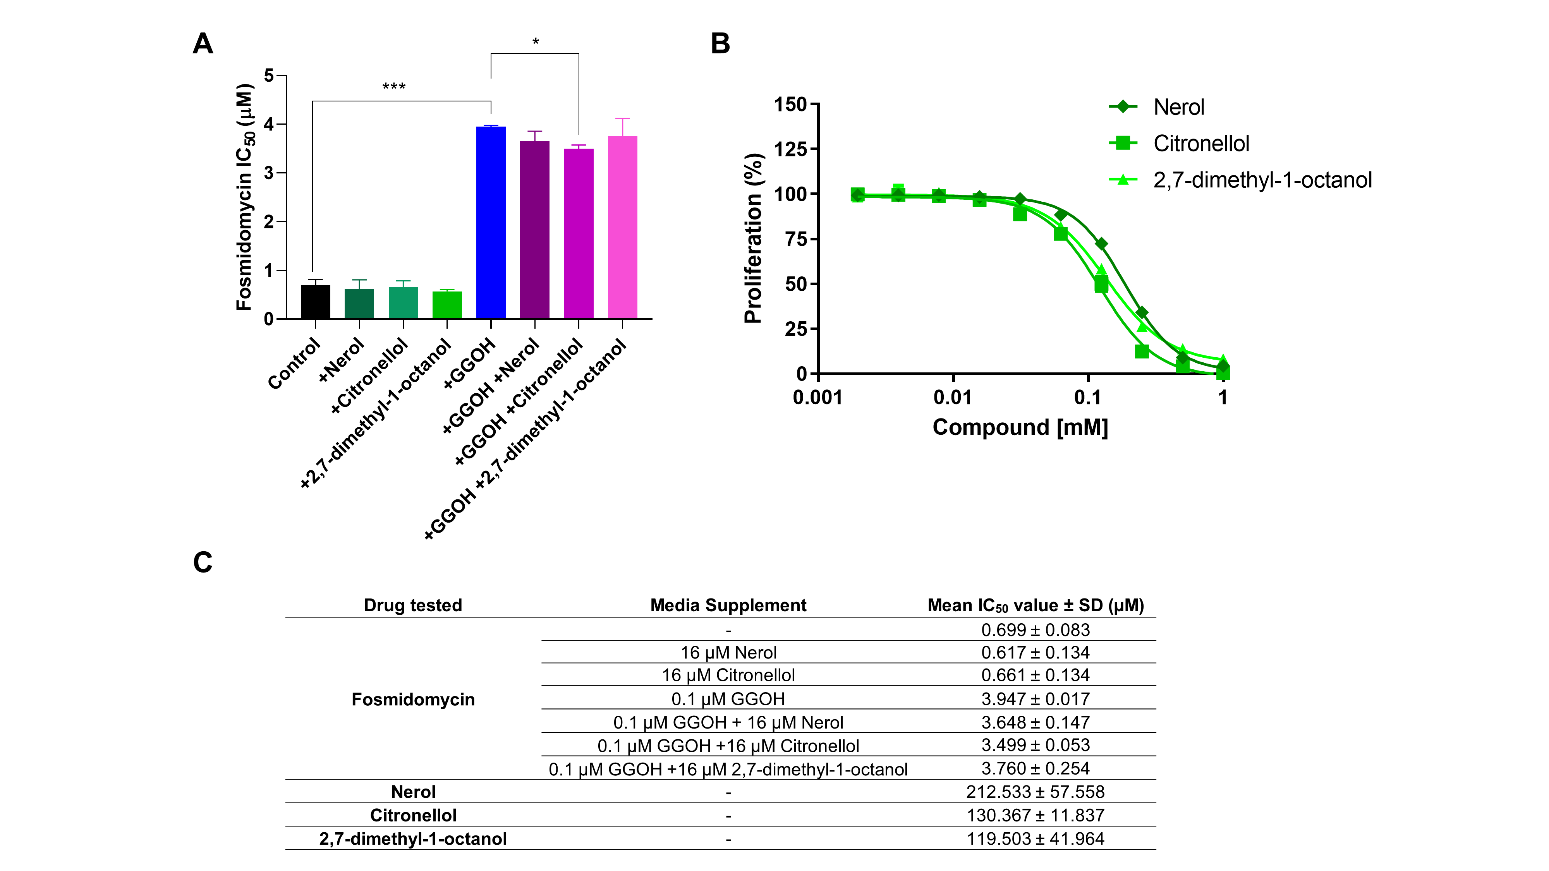
**

**Figure S4. Rescue assays with terpene and terpene-like substances.** The graph and its respective table shows the *P. falciparum* 3D7 strain IC50 values and dose-response curves of nerol, citronellol, 2,7-dimethyl-1-octanol, and fosmidomycin under the presence of a concentration 16 µM of different compounds, as indicated. Figure also shows the dose-responde curve of nerol, citronellol, 2,7-dimethyl-1-octanol. For this compounds, it was chosen a concentration of 16 µM for its proximity to the maximum concentration that does not produce toxic effects in parasites over 72 h. Statistical analysis was made using one-way ANOVA / Dunnet’s Multiple Comparison Test.*p<0.05, **p<0.01, ***p<0.001. Comparison made to Vehicle/Control data. Error bars represent standard deviation (n = 3).

**Figure S5. Geraniol inhibition of prenol uptake in** ***P. falciparum* parasites.** Figure shows [3H] GGOH incorporation levels in *P. falciparum* 3D7 straincultured under the absence / presence of 70 µM geraniol. This experiment was performed three times. Statistical analysis was made using one-way ANOVA / Dunnet’s Multiple Comparison Test.*p<0.05, **p<0.01, ***p<0.001 (n = 3).
